# Supplementary figures and images for: Risk Assessment Method for Cable System Construction of Long‐Span Suspension Bridge Based on Cloud Model
Source: Hindawi journal article supplement (doi:10.1155/2019/5720637), 2019-01-01

**The construction of Wuhan YangSiGang Yangtze River Bridge**

**
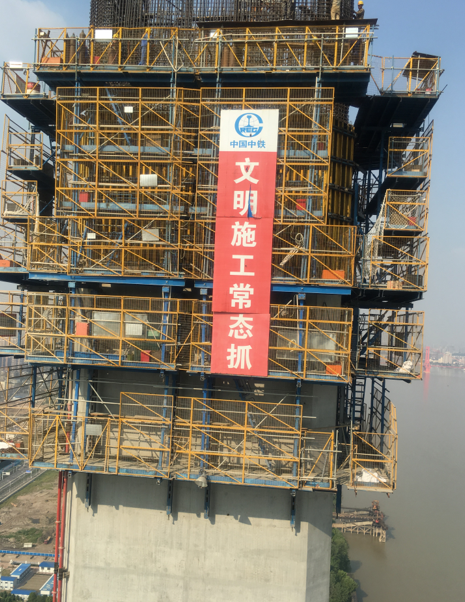

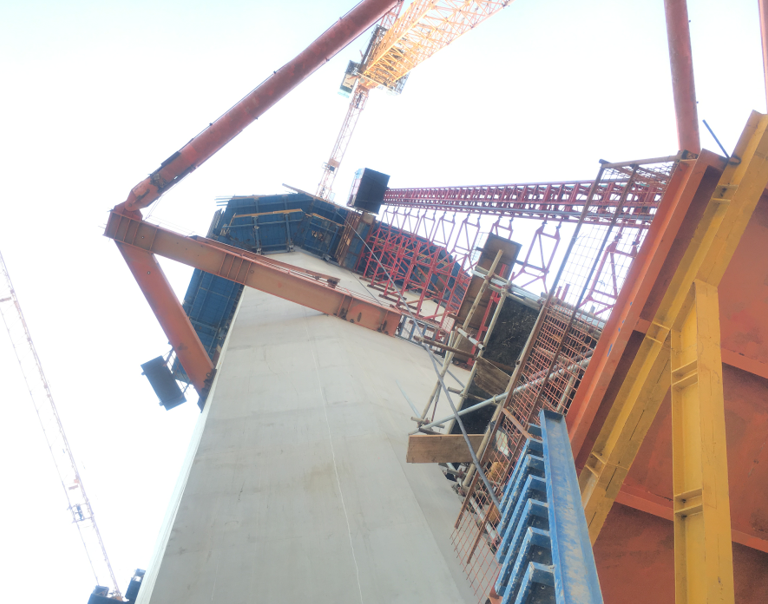
**

**
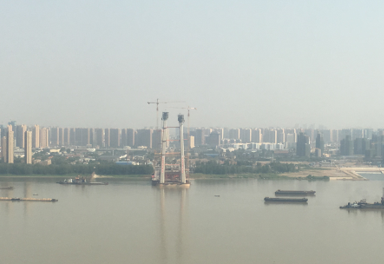
**

Supplement: f1 [file 5720637.f1.docx]
